# Supplementary material for: Genetic Characterization and Molecular Evolution of Urban Seoul Virus in Southern China
Source: MDPI journal article supplement (doi:10.3390/v11121137), 2019-12-09
Supplement: s1 [file s1]

## Supplementary Tables

**Table S1** Primers used to amplify the L, M, and S gene segments of SEOV

| Primer name | Sequence 5'-3'       | T <sub>m</sub> (°C) | Products (bp) |
|-------------|----------------------|---------------------|---------------|
| Seoul-LF1   | GGAAGAGACAAATCAAAAA  | 50                  | 835           |
| Seoul-LR1   | AAAACAATCAAACACAGCT  |                     |               |
| Seou-LF2    | AACCTCATCCCAGAAACCC  | 58                  | 967           |
| Seou-LR2    | CAACCAAAGAAGGAAAGCC  |                     |               |
| Seoul-LF3   | TTCTGGCTTTCCTTCTTTGG | 62                  | 768           |
| Seoul-LR3   | CCTCGATCAGCTTCTGTCCT |                     |               |
| Seoul-LR4   | ACAAGCTAGAATTGTGAGG  | 54                  | 1047          |
| Seoul-LF5   | TGTGAGATTGAGGTGATG   |                     |               |
| Seoul-LF5   | TTTTGAGGGTTGTGCTGTA  | 56                  | 1067          |
| Seoul-LR5   | GAGAATCTGGGAACTTTGC  |                     |               |
| Seoul-LF6   | GGGGAATGTGGAAGGAAC   | 56                  | 846           |
| Seoul-LR6   | GCTAAAAGAAACCGTGGG   |                     |               |
| Seoul-LF7   | CGGTTTCTTTTAGCACAT   | 54                  | 740           |
| Seoul-LR7   | ACAACAGACTCACCCCAT   |                     |               |
| Seoul-MF1   | GCAGGATCATGTGGAGTT   | 52                  | 620           |
| Seoul-MR1   | TATGCTTGCTATGGCGTA   |                     |               |
| Seoul-MF2   | GCTGTTTGATTGGTCTTGGT | 58                  | 1134          |
| Seou-MR2    | CTCTTGATTGCTTGTGTGGA |                     |               |
| Seoul-MF3   | TTGAAAAACAAAGGGTTC   | 56                  | 1005          |
| Seoul-MR3   | CTCCAAAGTGACAGGTAGA  |                     |               |
| Seoul-MF4   | ATGAGAGAATTGAATGGAG  | 52                  | 755           |
| Seoul-MR4   | AAGATTGGGAGATAGAAGA  |                     |               |
| Seoul-SF1   | TAACATCATTCGTGGTCCC  | 56                  | 471           |
| Seoul-SR1   | CTTGAAATTCCTTTGGCTC  |                     |               |
| Seoul-SF2   | AGTGTAGTTGGGTTTTTGG  | 54                  | 1003          |
| Seoul-SR2   | AAGGTTGTGAGGTAGTTTG  |                     |               |

**Table S2** The GenBank accession number of L, M, and S segments recovered in this study

| Seoul virus | Area (district) | Host sex | Accession number |           |           |
|-------------|-----------------|----------|------------------|-----------|-----------|
|             |                 |          | L segment        | M segment | S segment |
| GZRn36      | Liwan           | Male     | MN022844         | MN022816  | MN022788  |
| GZRn41      | Baiyun          | Female   | MN022845         | MN022817  | MN022789  |
| GZRn42      | Baiyun          | Male     | MN022846         | MN022818  | MN022790  |
| GZRn44      | Baiyun          | Female   | MN022847         | MN022819  | MN022791  |
| GZRn51      | Baiyun          | Male     | MN022848         | MN022820  | MN022792  |
| GZRn53      | Baiyun          | Male     | MN022849         | MN022821  | MN022793  |
| GZRn54      | Baiyun          | Female   | MN022850         | MN022822  | MN022794  |
| GZRn55      | Baiyun          | Female   | MN022851         | MN022823  | MN022795  |
| GZRn60      | Baiyun          | Female   | MN022852         | MN022824  | MN022796  |
| GZRn73      | Yuexiu          | Male     | MN022853         | MN022825  | MN022797  |
| GZRn74      | Yuexiu          | Male     | MN022854         | MN022826  | MN022798  |
| GZRn76      | Yuexiu          | Male     | MN022855         | MN022827  | MN022799  |
| GZRn77      | Yuexiu          | Male     | MN022856         | MN022828  | MN022800  |
| GZRn83      | Yuexiu          | Female   | MN022857         | MN022829  | MN022801  |
| GZRn84      | Yuexiu          | Female   | MN022858         | MN022830  | MN022802  |
| GZRn92      | Yuexiu          | Male     | MN022859         | MN022831  | MN022803  |
| GZRn93      | Yuexiu          | Male     | MN022860         | MN022832  | MN022804  |
| GZRn95      | Yuexiu          | Male     | MN022861         | MN022833  | MN022805  |
| GZRn96      | Yuexiu          | Female   | MN022862         | MN022834  | MN022806  |
| GZRn98      | Yuexiu          | Male     | MN022863         | MN022835  | MN022807  |
| GZRn100     | Yuexiu          | Male     | MN022864         | MN022836  | MN022808  |
| GZRn104     | Yuexiu          | Male     | MN022865         | MN022837  | MN022809  |
| GZRn107     | Yuexiu          | Female   | MN022866         | MN022838  | MN022810  |
| GZRn110     | Yuexiu          | Male     | MN022867         | MN022839  | MN022811  |
| GZRn127     | Haizhu          | Male     | MN022868         | MN022840  | MN022812  |
| GZRn133     | Haizhu          | Female   | MN022869         | MN022841  | MN022813  |
| GZRn134     | Haizhu          | Male     | MN022870         | MN022842  | MN022814  |
| GZRn148     | Liwan           | Female   | MN022871         | MN022843  | MN022815  |

**Table S3** SEOV strains and their GenBank accession number for those sequences used to create L, M, and S segment phylogenetic trees

| Segment  | Strain                       | Accession number | Country                      | Collection date |
|----------|------------------------------|------------------|------------------------------|-----------------|
| <b>L</b> | Humber/2012                  | JX879770         | United Kingdom               | 2012            |
|          | Cherwell/2013                | KM948594.1       | United Kingdom               | 2013            |
|          | ZT10/2007                    | EF581094.1       | <b>Zhejiang province</b>     | 2003            |
|          | ZT71/2006                    | EF190551.1       | <b>Zhejiang province</b>     | 2003            |
|          | Rn11-44/NGS/2011             | MF149940.1       | South Korea                  | 2011            |
|          | Fj372/2013                   | KP645196.1       | <b>Fujian province</b>       | 2013            |
|          | Hu02-258/NGS/2002            | MF149951.1       | South Korea                  | 2002            |
|          | Rn10-134/NGS/2010            | MF149938.1       | South Korea                  | 2010            |
|          | Rn10-145/NGS/2010            | MF149939.1       | South Korea                  | 2010            |
|          | Rn11-53/NGS/2011             | MF149941.1       | South Korea                  | 2011            |
|          | IR33/1984                    | KX079471.1       | United Kingdom               | 1984            |
|          | IR162/1984                   | KX079474.1       | United Kingdom               | 1984            |
|          | Rn84/2013                    | MG972931.1       | USA                          | 2013            |
|          | SEOV/NL/Rn2125/2016          | MG764082.1       | Netherlands                  | 2016            |
|          | SEOV/NL/Rn2147/2016          | MG764083.1       | Netherlands                  | 2016            |
|          | Northeast/Baltimore/2002     | KT897724.1       | USA                          | 2002            |
|          | 80_39/1991                   | X56492.1         | South Korea                  | 1991            |
|          | Tchoupitoulas/POR/1984       | KU204958.2       | USA                          | 1984            |
|          | JiangxiXianjianRn-07/2011    | KP900346.1       | <b>Jiangxi province</b>      | 2011            |
|          | DPRK08/2011                  | JX853574.1       | North Korea                  | 2011            |
|          | IR473/1984                   | KX079468.1       | United Kingdom               | 1984            |
|          | Seoul-DN2/2014               | KX289952.1       | <b>Heilongjiang province</b> | 2014            |
|          | LYON/Rn/FRA/2013/LYO852/2011 | KF387723.1       | France                       | 2011            |
|          | Humber/2012                  | KM948596.1       | United Kingdom               | 2012            |
|          | Rn10-134/2010                | MF149936.1       | South Korea                  | 2010            |
|          | Rn10-145/2010                | MF149937.1       | South Korea                  | 2010            |
| <b>M</b> | K24-c7/2000                  | AF288652.1       | <b>Zhejiang province</b>     | 2000            |
|          | K24-v2/2000                  | AF288654.1       | <b>Zhejiang province</b>     | 2000            |
|          | ZT10/2003                    | DQ159911.1       | <b>Zhejiang province</b>     | 2005            |
|          | IR33/1984                    | KX079472.1       | United Kingdom               | 1984            |
|          | IR162/1984                   | KX079475.1       | United Kingdom               | 1984            |
|          | IR473/1984                   | KX079469.1       | United Kingdom               | 1984            |
|          | Rn84/2013                    | MG972934.1       | Netherlands                  | 2013            |
|          | Rn10-134/NGS/2010            | MF149942.1       | South Korea                  | 2010            |
|          | Rn10-145/NGS/2010            | MF149943.1       | South Korea                  | 2010            |
|          | Rn11-44/NGS/2011             | MF149944.1       | South Korea                  | 2011            |

|          |                                       |             |                              |      |
|----------|---------------------------------------|-------------|------------------------------|------|
|          | Rn11-53/NGS/2011                      | MF149945.1  | South Korea                  | 2011 |
|          | NL/Rn2147/2016                        | MG764081.1  | Netherlands                  | 2016 |
|          | NL/Rn2125/2016                        | MG764080.1  | Netherlands                  | 2016 |
|          | Fj372/2013                            | KP645197.1  | <b>Fujian province</b>       | 2013 |
|          | Cherwell/2013                         | KM948593.1  | United Kingdom               | 2013 |
|          | Humber/2012                           | JX879768.1  | United Kingdom               | 2012 |
|          | Humber/2012                           | KM948597.1  | United Kingdom               | 2012 |
|          | Northeast/Baltimore/2002              | KT897725.1  | USA                          | 2002 |
|          | ZT71/2003                             | EF117248.1  | <b>Zhejiang province</b>     | 2003 |
|          | 80_39/1991                            | NC_005237.1 | South Korea                  | 1991 |
|          | Tchoupitoulas/POR/1984                | KU204959.2  | USA                          | 1984 |
|          | HaixingRn40/2010                      | GU592924    | <b>Zhejiang province</b>     | 2010 |
|          | RuianRn242/2010                       | GU592928.1  | <b>Zhejiang province</b>     | 2010 |
|          | LongwanRn58/2010                      | GU592930.1  | <b>Zhejiang province</b>     | 2010 |
|          | DPRK08/2011                           | JX853576.1  | North Korea                  | 2011 |
|          | HBQ17/2013                            | KM233655.1  | <b>Hebei province</b>        | 2013 |
|          | Seoul/DN2/2014                        | KX289953.1  | <b>Heilongjiang province</b> | 2014 |
|          | <i>Orthohantavirus</i> /158446/2015   | KY639551.1  | <b>Shandong province</b>     | 2015 |
|          | <i>Orthohantavirus</i> /N23/2013      | KY639555.1  | <b>Shandong province</b>     | 2013 |
|          | JNDX70/2014                           | KY639558.1  | <b>Shandong province</b>     | 2014 |
|          | JX20141159/2014                       | KY639563.1  | <b>Shandong province</b>     | 2014 |
|          | JX20131067/2013                       | KY639569.1  | <b>Shandong province</b>     | 2013 |
|          | JX20140544/2014                       | KY639572.1  | <b>Shandong province</b>     | 2014 |
|          | JX20141138/2014                       | KY639573.1  | <b>Shandong province</b>     | 2014 |
|          | LZSF8/2014                            | KY639580.1  | <b>Shandong province</b>     | 2014 |
|          | 2015B21/2015                          | KY639585.1  | <b>Shandong province</b>     | 2015 |
|          | YY20151056/2015                       | KY639588.1  | <b>Shandong province</b>     | 2015 |
|          | 2015E5/2015                           | KY639601.1  | <b>Shandong province</b>     | 2015 |
|          | YY140512/2014                         | KY639613.1  | <b>Shandong province</b>     | 2014 |
|          | YY140523/2014                         | KY639613.1  | <b>Shandong province</b>     | 2014 |
|          | YY140532/2014                         | KY639618.1  | <b>Shandong province</b>     | 2014 |
|          | <i>Orthohantavirus</i> /AQ150325/2015 | KY639619.1  | <b>Shandong province</b>     | 2015 |
|          | ZBLZ19/2014                           | KY639620.1  | <b>Shandong province</b>     | 2014 |
|          | Hu02-258/NGS/2002                     | MF149946.1  | South Korea                  | 2002 |
| <b>S</b> | GuangzhouRn36/2010                    | GU592948.1  | <b>Guangdong province</b>    | 2010 |
|          | Seoul/CSG5/2007                       | AB618112.1  | Vietnam                      | 2007 |
|          | SEOV/NL/Rn2147/2016                   | MG764079.1  | Netherlands                  | 2016 |
|          | SEOV/NL/Rn2125/2016                   | MG764078.1  | Netherlands                  | 2016 |
|          | Hu02-258/NGS/2002                     | MF149954.1  | South Korea                  | 2002 |
|          | Rn11-53/NGS/2011                      | MF149950.1  | South Korea                  | 2011 |
|          | Rn11-44/NGS/2011                      | MF149949.1  | South Korea                  | 2011 |
|          | Rn10-145/NGS/2010                     | MF149948.1  | South Korea                  | 2010 |
|          | Rn10-134/NGS                          | MF149947.1  | South Korea                  | 2010 |
|          | DN2/2014                              | KX289954.1  | <b>China</b>                 | 2014 |

|                                     |             |                              |      |
|-------------------------------------|-------------|------------------------------|------|
| Northeast/Baltimore/2002            | KT897726.1  | USA                          | 2002 |
| IR162/1984                          | KX079476.1  | United Kingdom               | 1984 |
| IR33/1984                           | KX079473.1  | United Kingdom               | 1984 |
| Fj372/2013                          | KP645198.1  | <b>Fujian province</b>       | 2013 |
| Humber/2012                         | JX879769.1  | United Kingdom               | 2012 |
| Humber/2012                         | KM948598.1  | United Kingdom               | 2012 |
| Cherwell/2013                       | KC626089.1  | United Kingdom               | 2013 |
| DPRK08/2011                         | JX853575.1  | North Korea                  | 2011 |
| ZT10/2003                           | AY766368.1  | <b>Zhejiang province</b>     | 2003 |
| ZT71/2003                           | AY750171.1  | <b>Zhejiang province</b>     | 2003 |
| IR473/1984                          | KX079470.1  | United Kingdom               | 1984 |
| Rn84/2013                           | MG972939.1  | Netherlands                  | 2013 |
| Tchoupitoulas/POR/1984              | KU204960.2  | USA                          | 1984 |
| 80_39 /1991                         | NC_005236.1 | South Korea                  | 1991 |
| Hantavirus/R22/2002                 | AF488707.1  | <b>Henan province</b>        | 2002 |
| Seoul-virus-2000                    | AY006465.1  | <b>Heilongjiang province</b> | 2000 |
| Hantavirus-BjHD01/2004              | AY627049.2  | <b>Beijing</b>               | 2004 |
| Hantavirus-JUN5-14/2004             | DQ217791.1  | <b>Shandong province</b>     | 2004 |
| CixiRf23/2007                       | FJ803201.1  | <b>Zhejiang province</b>     | 2007 |
| CixiRn169/2007                      | FJ803207.1  | <b>Zhejiang province</b>     | 2007 |
| OuhaiRn189/2007                     | FJ803211.1  | <b>Zhejiang province</b>     | 2007 |
| RuianRn33/2007                      | FJ803215.1  | <b>Zhejiang province</b>     | 2007 |
| Singapore/06-RN41/2006              | GQ274944.1  | Singapore                    | 2006 |
| HuBJ22/2006                         | GQ279379.1  | <b>Beijing</b>               | 2006 |
| Rn-M11/2006                         | GQ279383.1  | <b>Beijing</b>               | 2006 |
| HuBJ15/2005                         | GQ279390.1  | <b>Beijing</b>               | 2005 |
| HebeiMm7/2010                       | GU592935.1  | <b>Hebei province</b>        | 2010 |
| ShenyangRn19/2010                   | GU592950.1  | <b>Liaoning province</b>     | 2010 |
| RuianRn180/2010                     | GU592953.1  | <b>Zhejiang province</b>     | 2010 |
| WuhanRn10/2009                      | JQ665920.1  | <b>Hubei province</b>        | 2009 |
| REPLONGES-Hu-FRA/2012/12-0882A/2012 | KC902522.1  | France                       | 2012 |
| Gongzhuling42/2009                  | KF745942.1  | <b>Jilin province</b>        | 2009 |
| Gongzhuling415/2011                 | KF745949.1  | <b>Jilin province</b>        | 2011 |
| Taonan52/2011                       | KF745950.1  | <b>Jilin province</b>        | 2011 |
| MANTENAY-MONTLIN/Rn/FRA/2015        | KX064273.1  | France                       | 2015 |
| JX20131073/2013                     | KY639669.1  | <b>Shandong province</b>     | 2013 |
| YY20140523/2014                     | KY639671.1  | <b>Shandong province</b>     | 2014 |
| ZBLZ34/2014                         | KY639679.1  | <b>Shandong province</b>     | 2014 |
| XJ5-2011/2011                       | KY807170.1  | <b>Jiangxi province</b>      | 2011 |
| Hu02-294-NGS/2002                   | MF149955.1  | South Korea                  | 2002 |

Note: Country in bold represent the areas that belong to China. There are total 11 provinces (Zhejiang, Fujian, Jiangxi, Heilongjiang, Hebei, Shandong, Guangdong, Henan, Liaoning, Hubei, and Jilin) and one independently administered municipal district (Beijing).

**Table S4** Nucleotide length, best-fit model, and MCMC chain length for each gene segment of SEOV

| Gene | Nucleotide length (bp) | Substitution models <sup>1</sup> | Relax-clock models <sup>2</sup> | Tree models      | MCMC chain length <sup>3</sup> |
|------|------------------------|----------------------------------|---------------------------------|------------------|--------------------------------|
| L    | 6288                   | GTR+G+I                          | UCLD                            | Bayesian SkyGrid | 200                            |
| M    | 3402                   | GTR+G+I                          | UCLD                            | Bayesian Skyline | 100                            |
| S    | 903                    | GTR+G                            | UCLD                            | Bayesian Skyline | 100                            |

<sup>1</sup> The nucleotide substitution models were determined by jModeltest2.1.7.

<sup>2</sup> UCLD represents uncorrelated lognormal clock model.

<sup>3</sup> The unit was million.
